# Supplementary figures and images for: Inhibitory Effect against Listeria monocytogenes of Carbon Nanoparticles Loaded with Copper as Precursors of Food Active Packaging
Source: MDPI journal article supplement (doi:10.3390/foods11192941), 2022-09-20

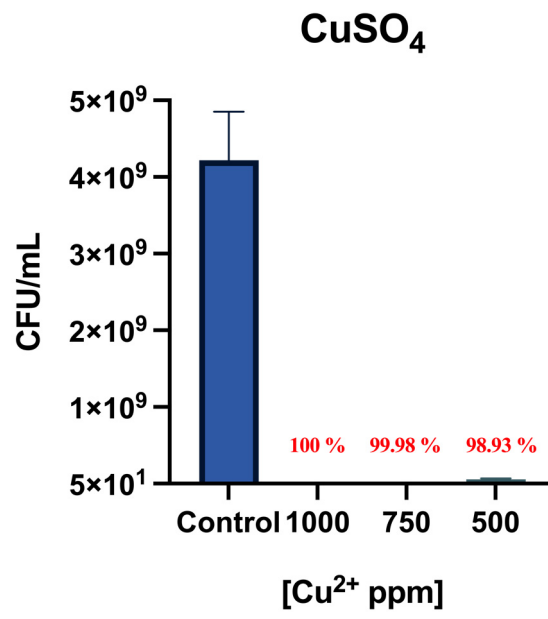

**Figure S5.** Soluble copper antimicrobial activity on *Listeria monocytogenes*

Supplement: s1 [file s1]

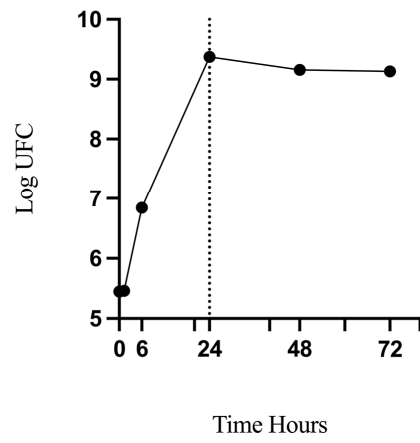

**Figure S1.** *Listeria monocytogenes* growth in optimal conditions

Supplement: s1 [file s1]

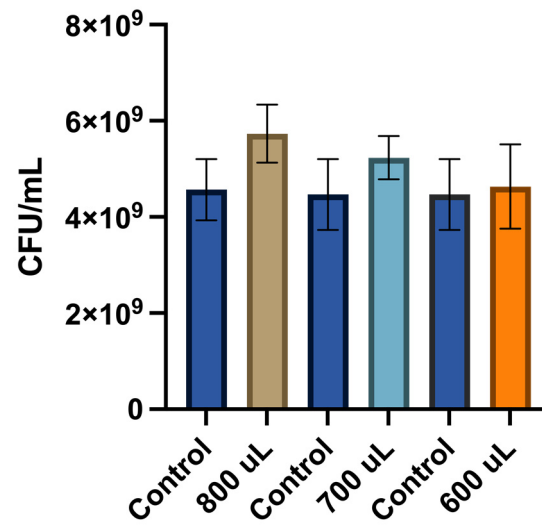

**Figure S3.** *Listeria monocytogenes*' growth in reduction of nutrients conditions

Supplement: s1 [file s1]

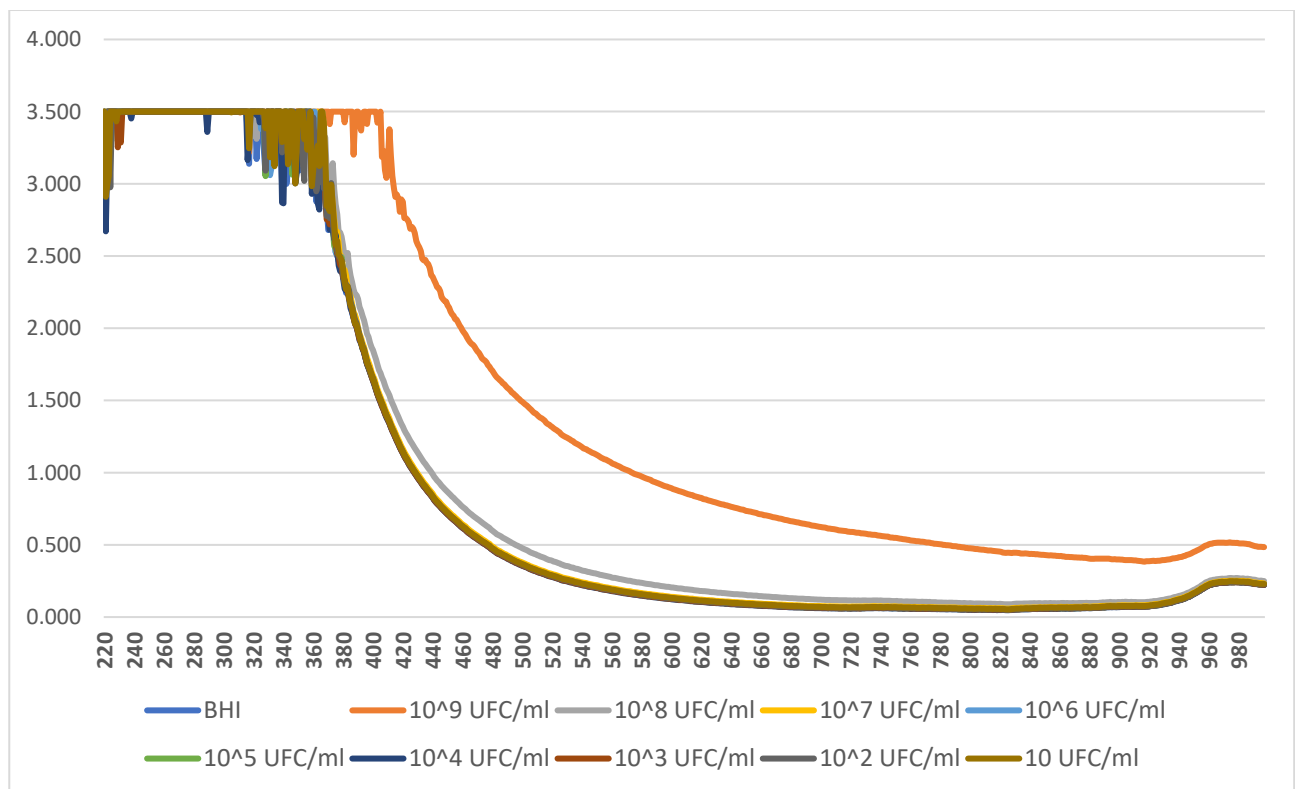

**Figure S4.** Absorbance spectra of *Listeria monocytogenes* serial dilutions

Supplement: s1 [file s1]
